# Supplementary material
Source: MDPI journal article supplement (https://www.mdpi.com/2073-4395/12/10/2442)
Supplement: s1 [file s1]

## Aakansha\_map\_2021\_A1

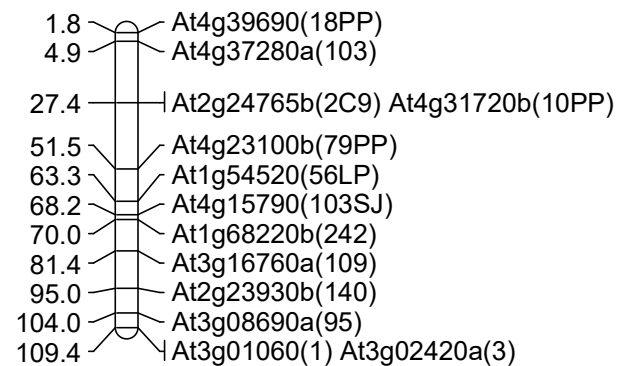

## Ramchiary\_map\_2007\_A1

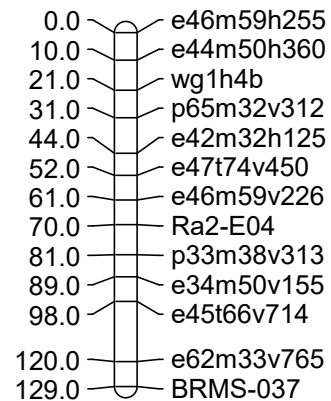

## Yadava\_map\_2012\_A1

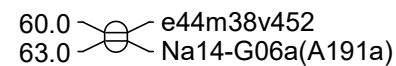

# Jagannath\_map\_2010(SE)\_A1

# Jagannath\_map\_2010(ZE)\_A1

# Lionneton\_map\_2002\_A1

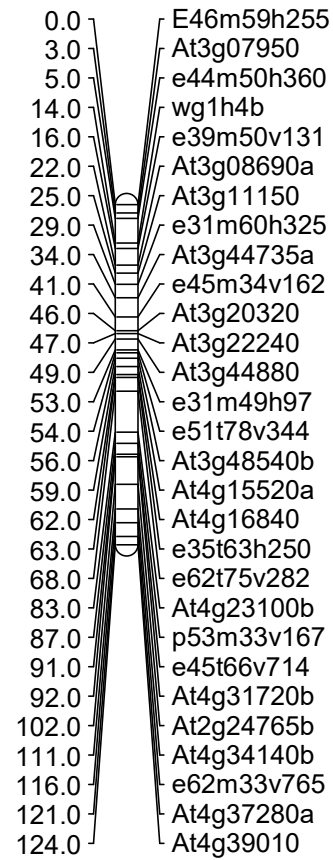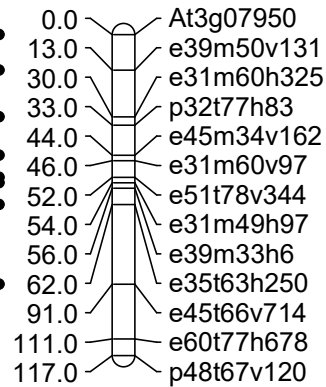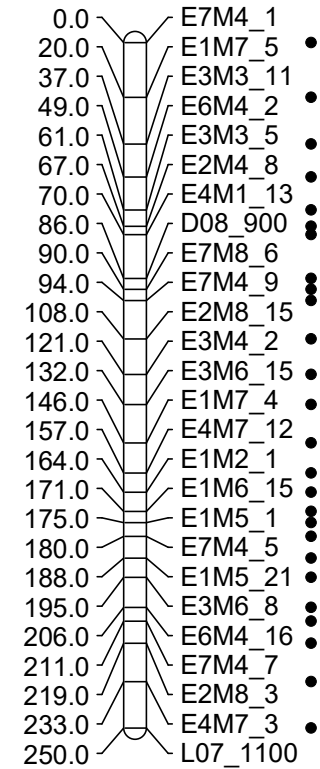

Lionneton\_map\_2004\_A1   Rout\_map\_2018\_A1   Sharma\_map\_2002\_A1   Singh\_map\_2012\_A1

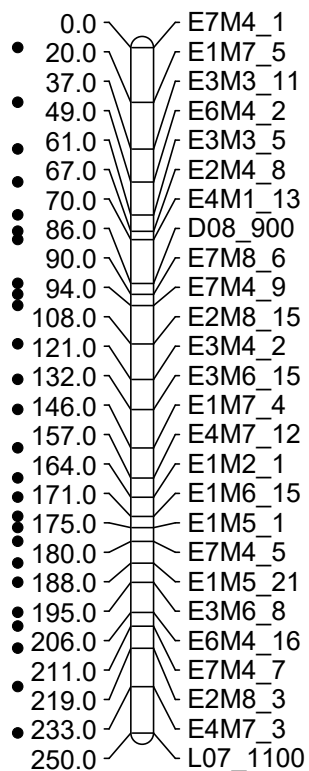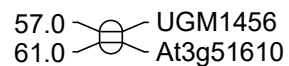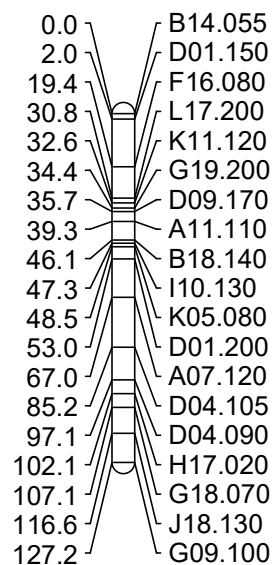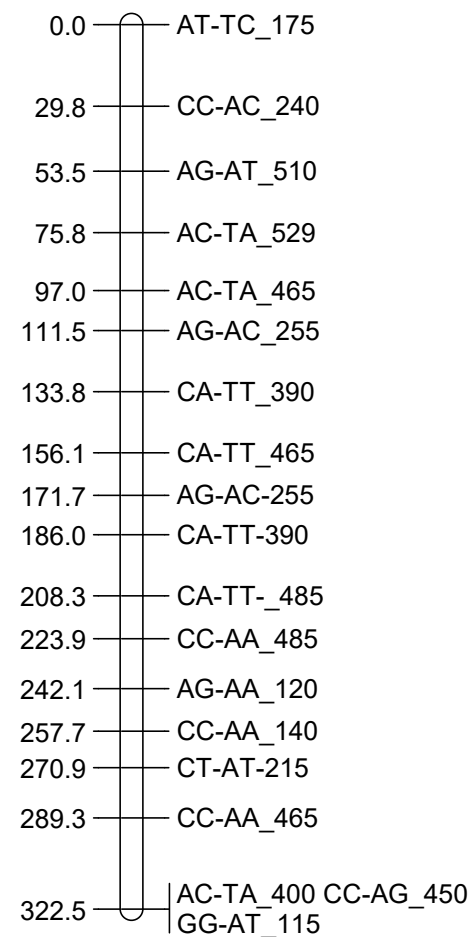

# Aakansha\_map\_2021\_A2   Ramchiary\_map\_2007\_A2   Yadava\_map\_2012\_A2

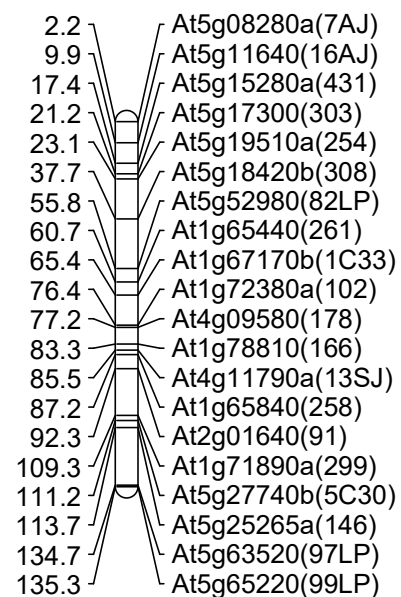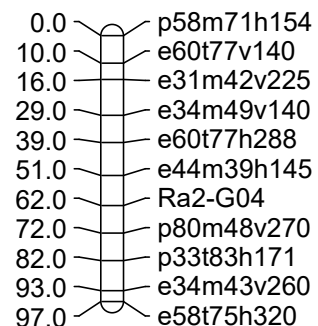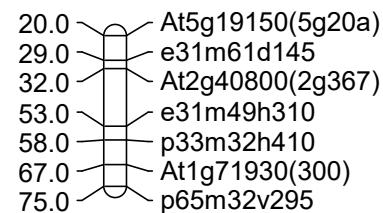

Jagannath\_map\_2010(SE)\_A2

Jagannath\_map\_2010(ZE)\_A2

Lionneton\_map\_2002\_A2

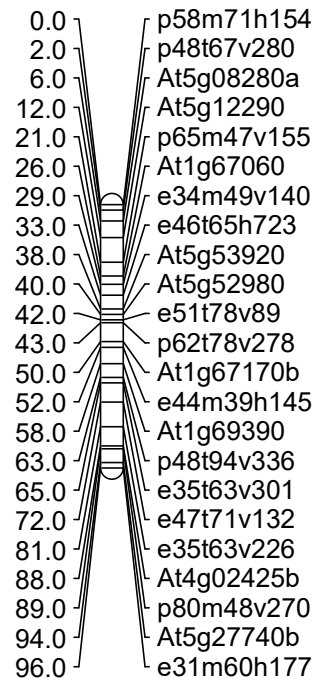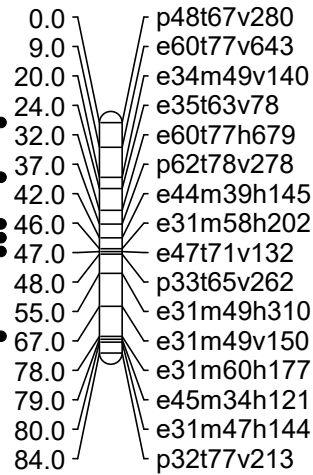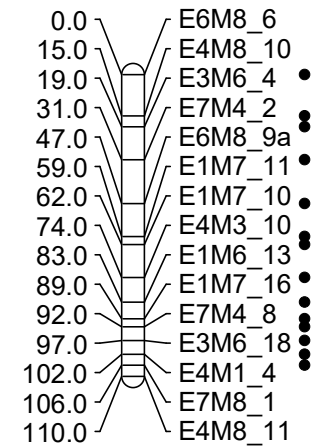

Lionneton\_map\_2004\_A2

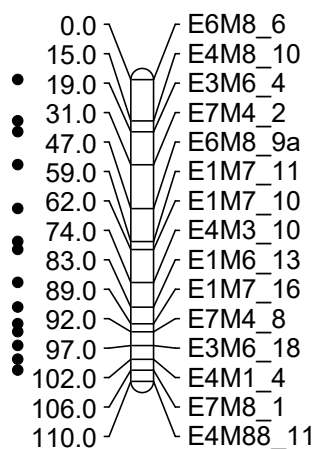

Rout\_map\_2015\_A2

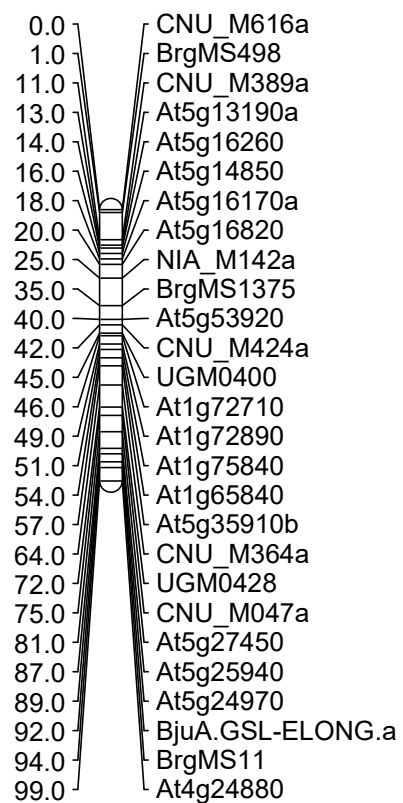

Rout\_map\_2018\_A2

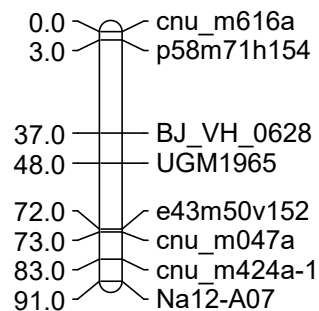

Singh\_map\_2012\_A2

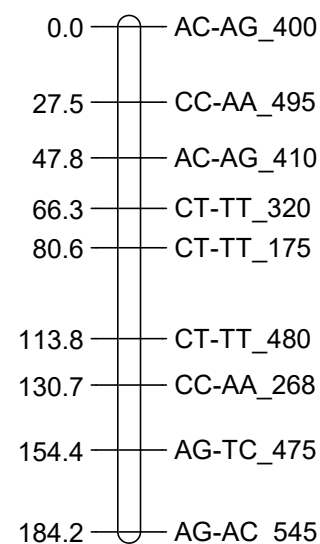

### Aakansha\_map\_2021\_A3

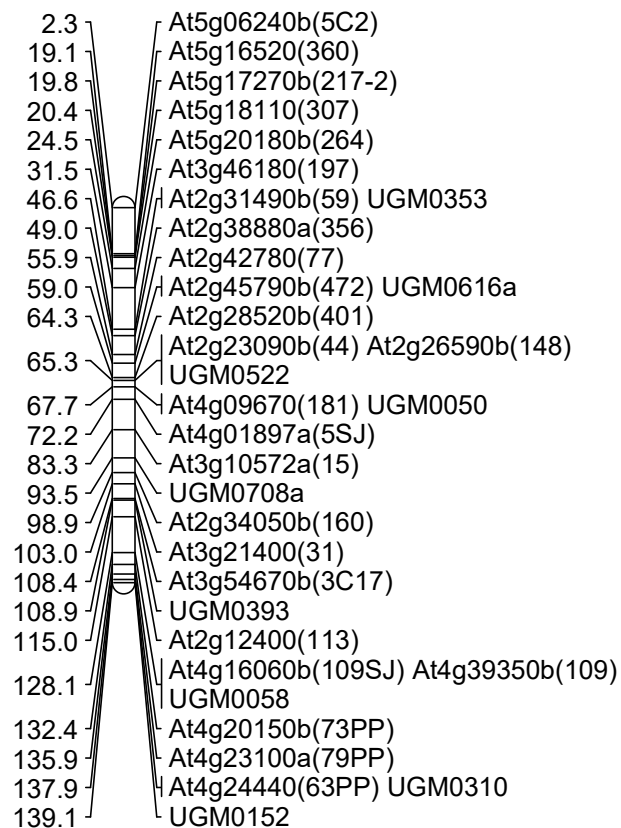

### Dhaka\_map\_2016\_A3

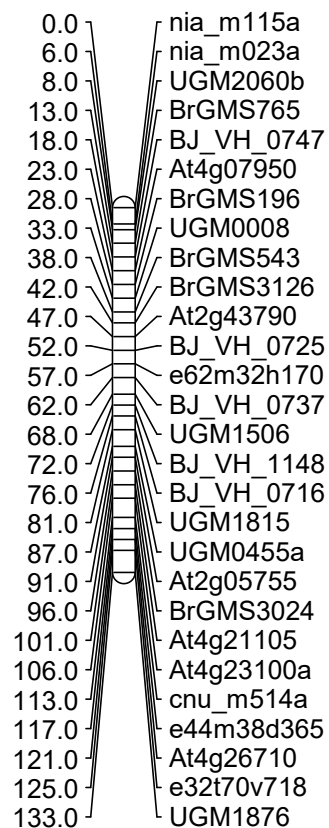

### Ramchiary\_map\_2007\_A3

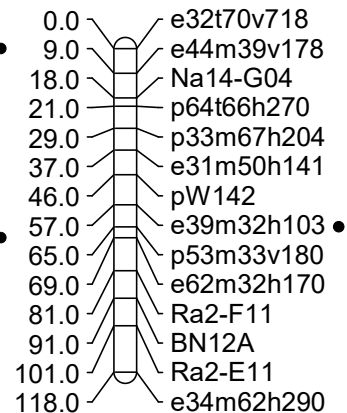

## Yadava\_map\_2012\_A3

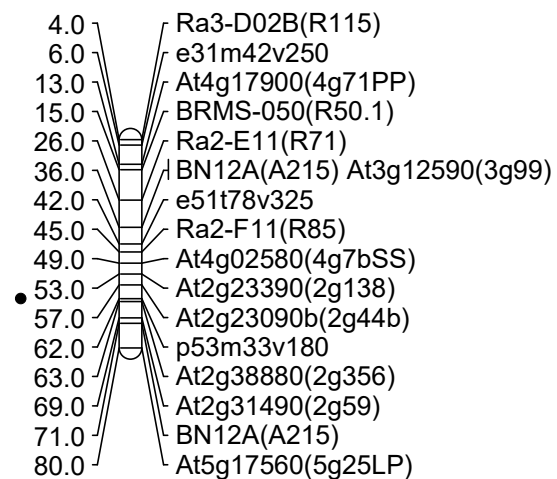

## Gupta\_map\_2004\_A3

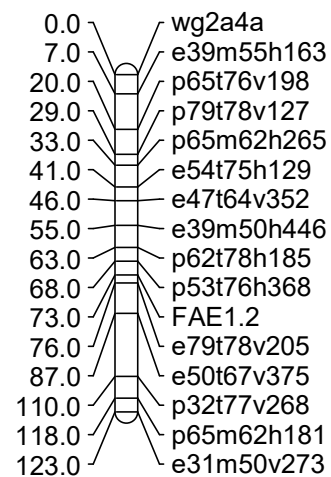

## Jagannath\_map\_2010(ZE)\_A3

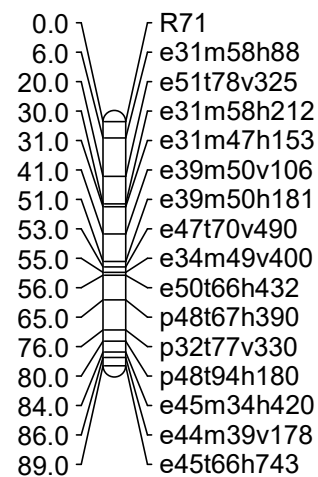



**Lionneton\_map\_2002\_A3**

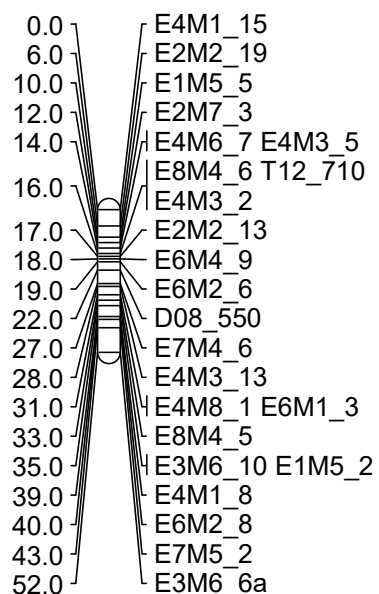

**Lionneton\_map\_2004\_A3**

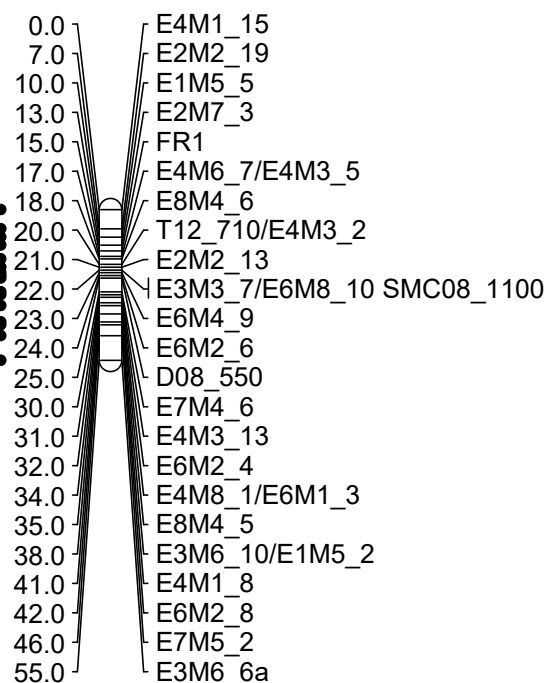

**Rout\_map\_2015\_A3**

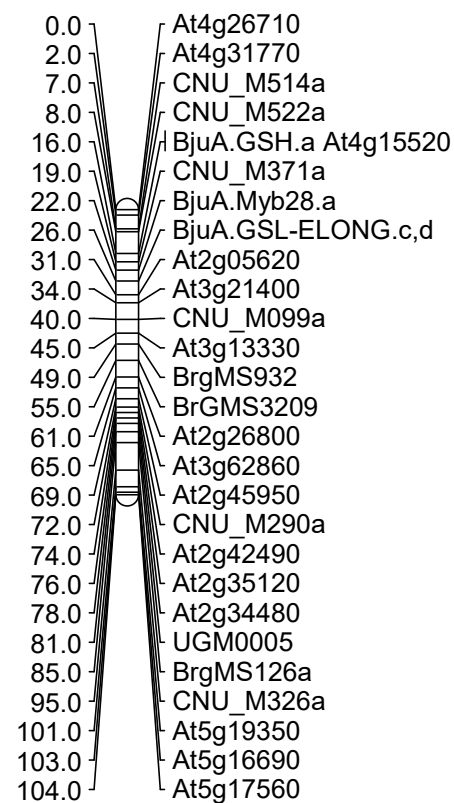

**Rout\_map\_2018\_A3**

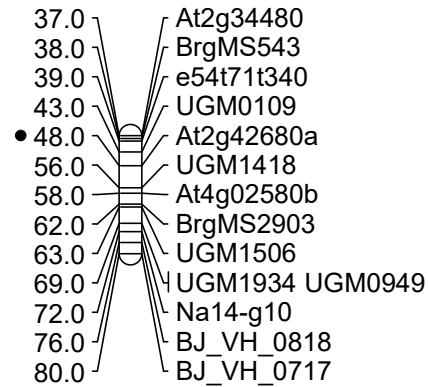

**Singh\_map\_2012\_A3**

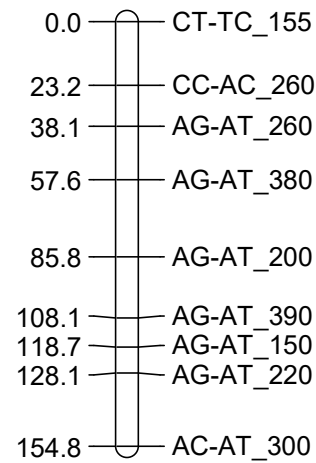

**Aakansha\_map\_2021\_A4**

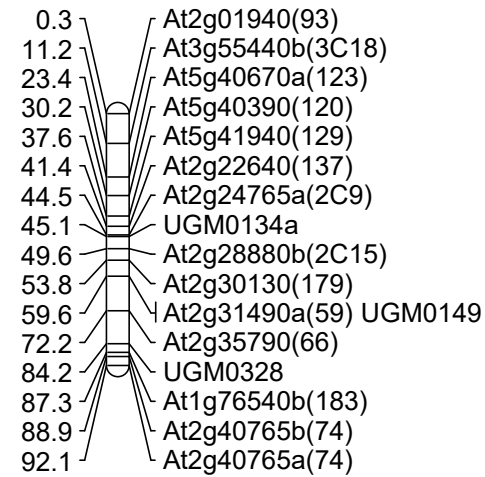

**Ramchiary\_map\_2007\_A4**

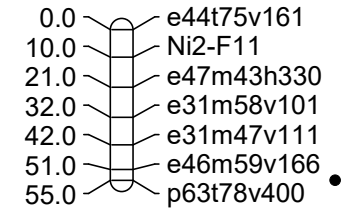

## Yadava\_map\_2012\_A4

## Rout\_map\_2018\_A4

## Aakansha\_map\_2021\_A5

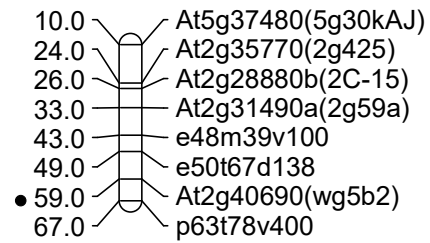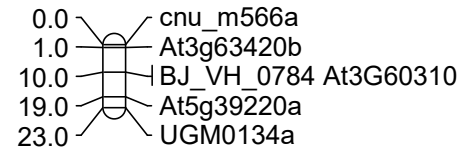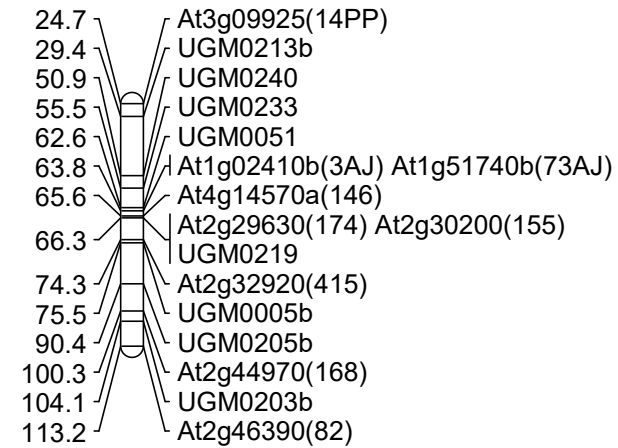

Yadava\_map\_2012\_A5

Lionneton\_map\_2004\_A5

Rout\_map\_2018\_A5

Singh\_map\_2012\_A5

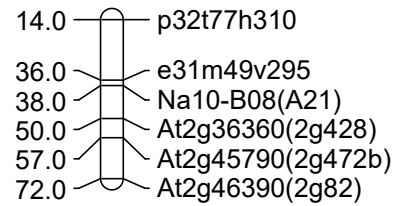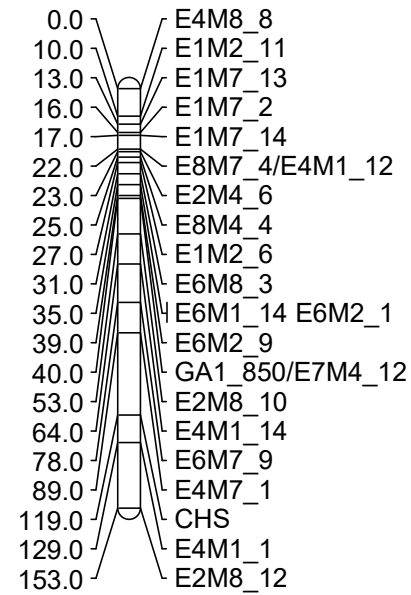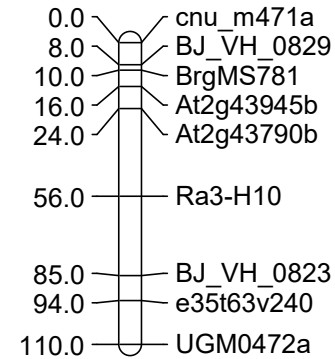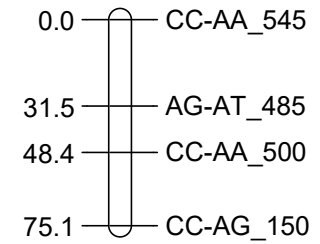

Aakansha\_map\_2021\_A6

Ramchiary\_map\_2007\_A6

Yadava\_map\_2012\_A6

Lionneton\_map\_2002\_A6

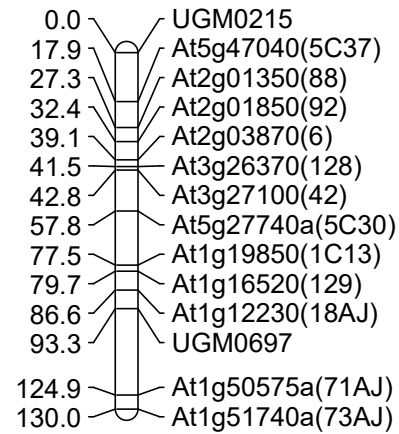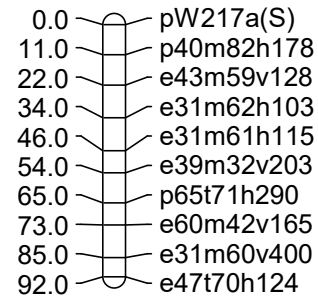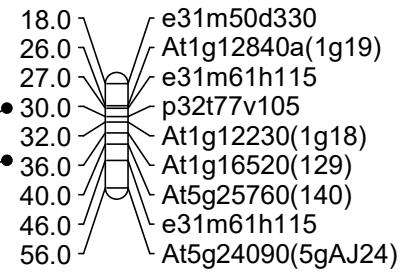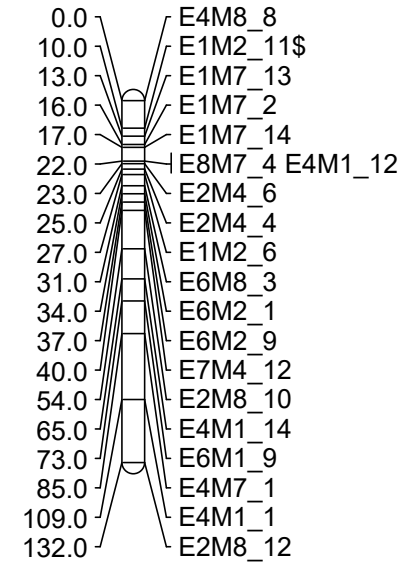

**Rout\_map\_2015\_A6**

**Rout\_map\_2018\_A6**

**Singh\_map\_2012\_A6**

**Aakansha\_map\_2021\_A7**

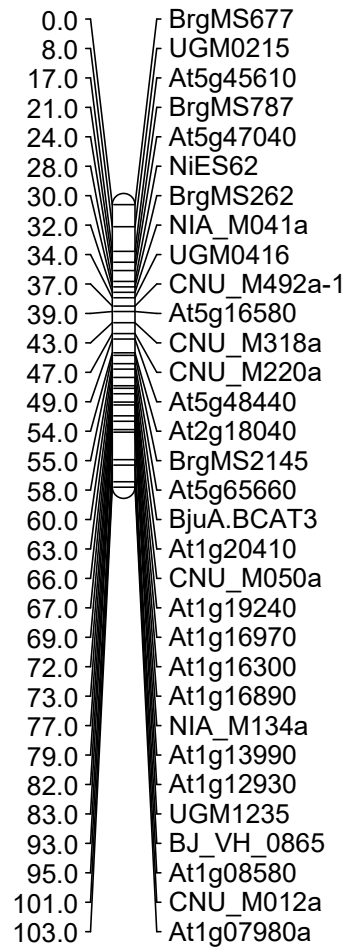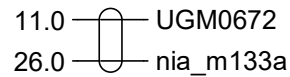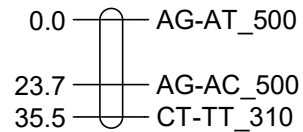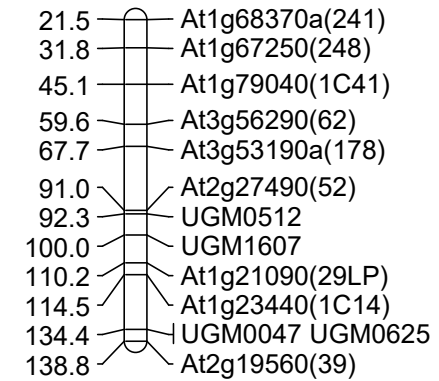

# Dhaka\_map\_2016\_A7    Ramchiary\_map\_2007\_A7    Yadava\_map\_2012\_A7

0.0    At2g19450  
5.0    p63t71d400  
11.0    UGM0124  
15.0    BJ\_VH\_0225  
21.0    At2g28430a  
25.0    e62t75d210  
32.0    At3g56290  
35.0    UGM1784  
41.0    UGM2101  
47.0    At1g67350c  
51.0    At1g68510  
55.0    cnu\_m054a  
59.0    At1G74140  
65.0    At1g76540a  
67.0    cnu\_m049a

0.0    pX156  
11.0    p53m42h153  
21.0    p62t78v211  
33.0    Ra2-A01  
42.0    e43m50v245  
53.0    ABN6A3  
64.0    e62m32h10  
69.0    p53m42v250

0.0    At1g76540(183a)  
5.0    At1g70800(288a) At1g73240(1g83LP)  
9.0    e60t65v253  
13.0    At1g68310(1g77a)  
15.0    p62t78v211  
18.0    p53m42h153  
19.0    e31m42h173  
26.0    At1g79040(1c41) At1g68370(241a)  
35.0    e32t66h88  
36.0    At1g79040(1c41)  
39.0    At2g27490(2g52)  
42.0    Ra2-A01a(R17a)  
43.0    e34m50v137  
49.0    e32t66h88  
59.0    e50t66h139 At2g27490(2g52)  
64.0    At2g18900(2c4)

# Jagannath\_map\_2010(SE)\_A7   Jagannath\_map\_2010(ZE)\_A7   Lionneton\_map\_2004\_A7

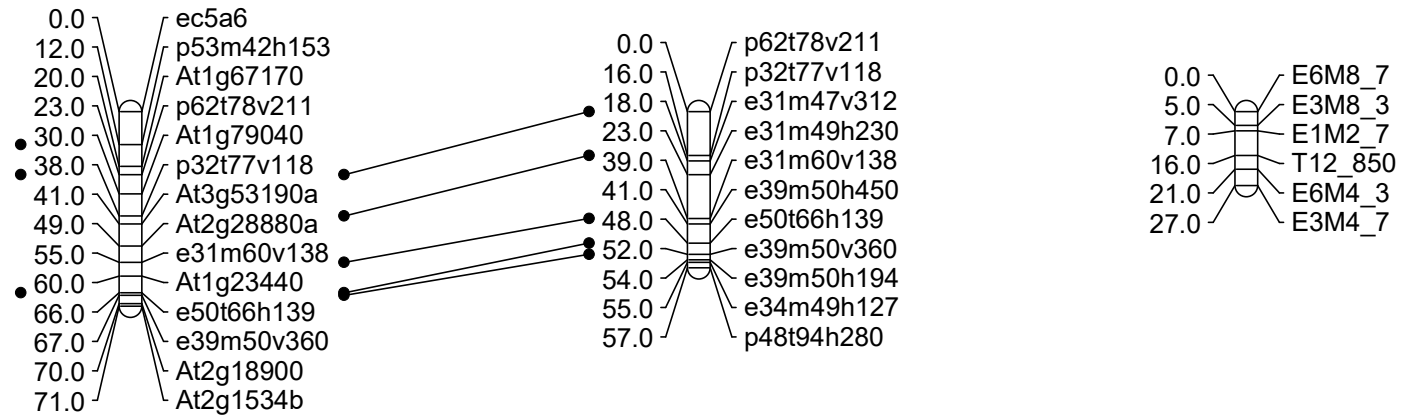



**Rout\_map\_2015\_A7**

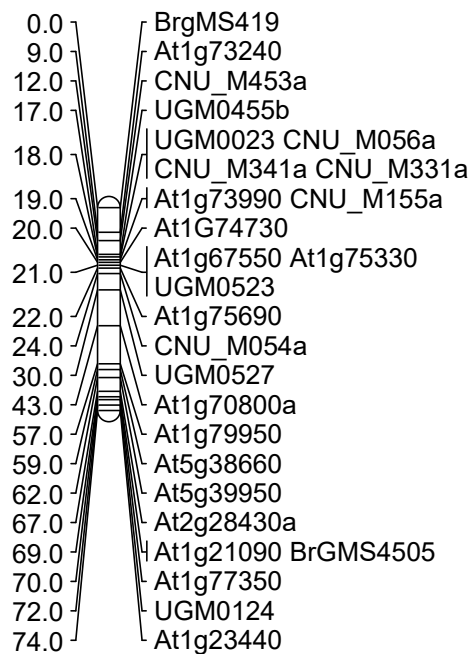

**Rout\_map\_2018\_A7**

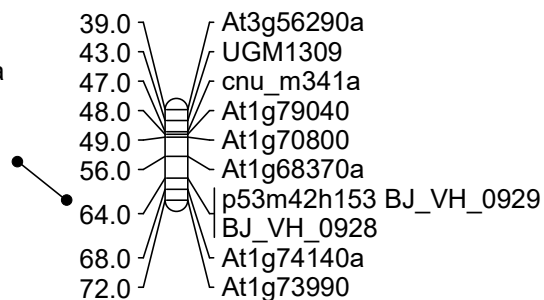

**Aakansha\_map\_2021\_A8**

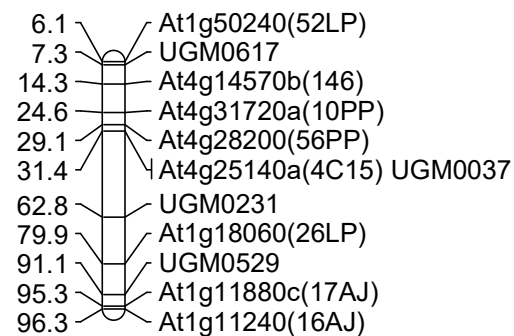

Ramchiary\_map\_2007\_A8

Yadava\_map\_2012\_A8

Jagannath\_map\_2010(SE)\_A8

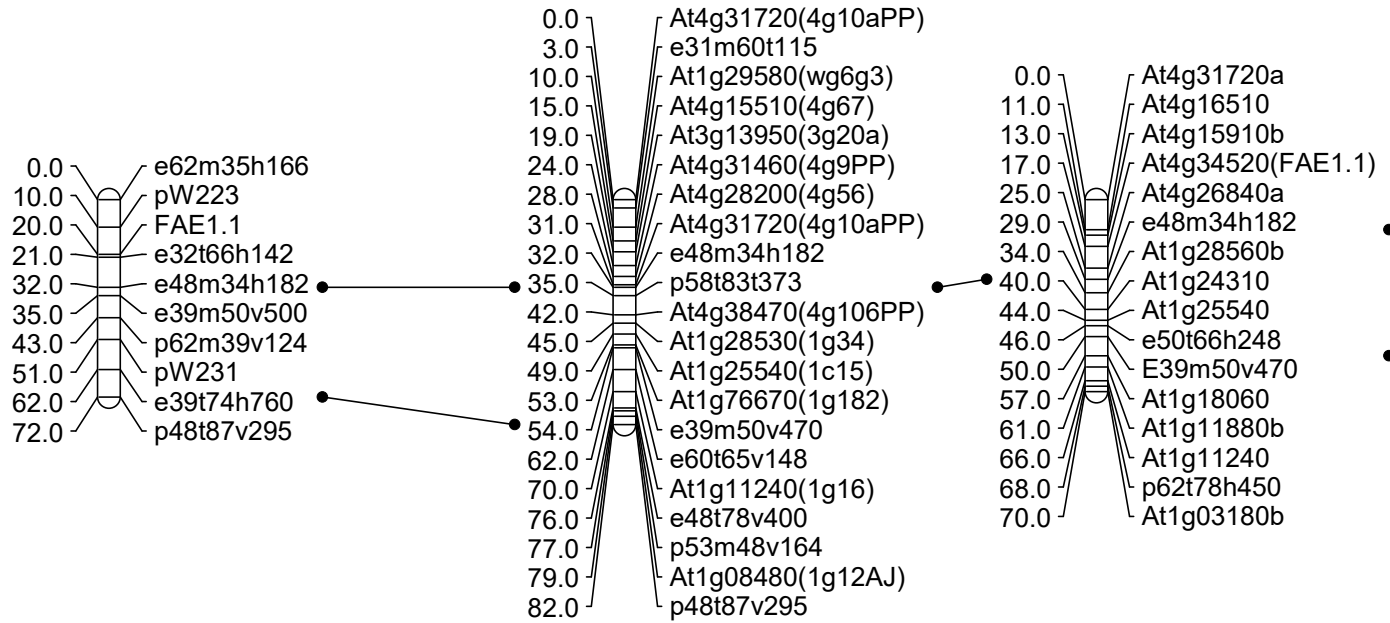

**Khattak\_map\_2019\_A8**

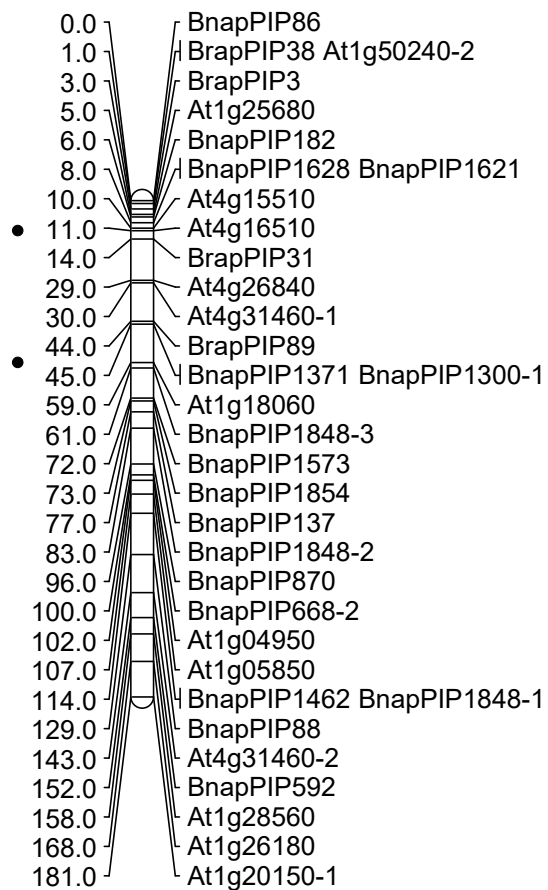

**Lionneton\_map\_2004A\_8**

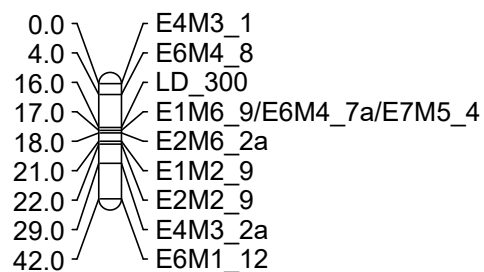

**Rout\_map\_2015\_A8**

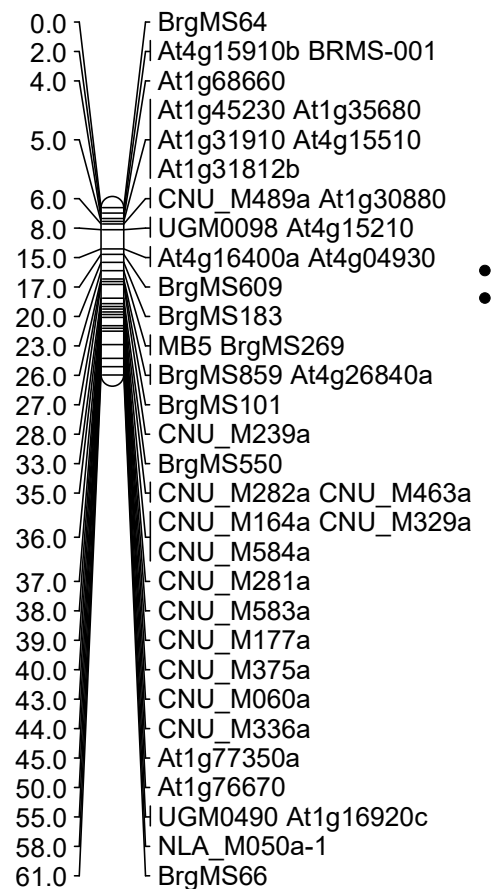

**Rout\_map\_2018\_A8**

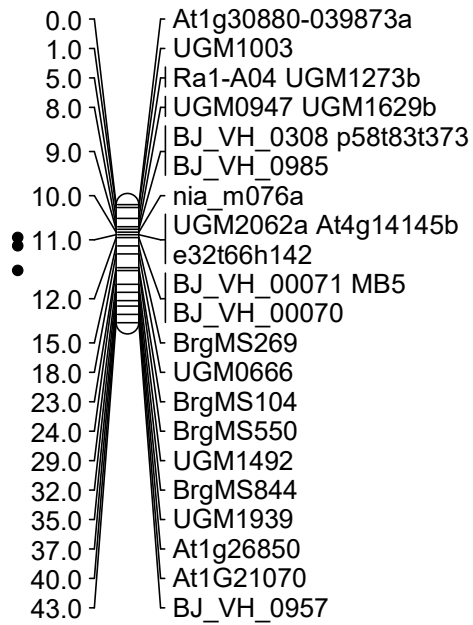

**Singh\_map\_2012\_A8**

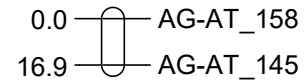

**Aakansha\_map\_2021\_A9**

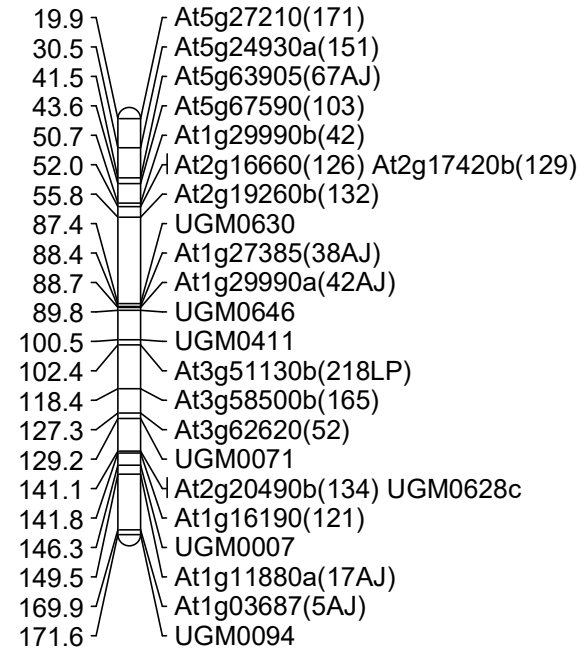

# Ramchiary\_map\_2007\_A9    Yadava\_map\_2012\_A9

# Aggarwal\_map\_2003\_A9

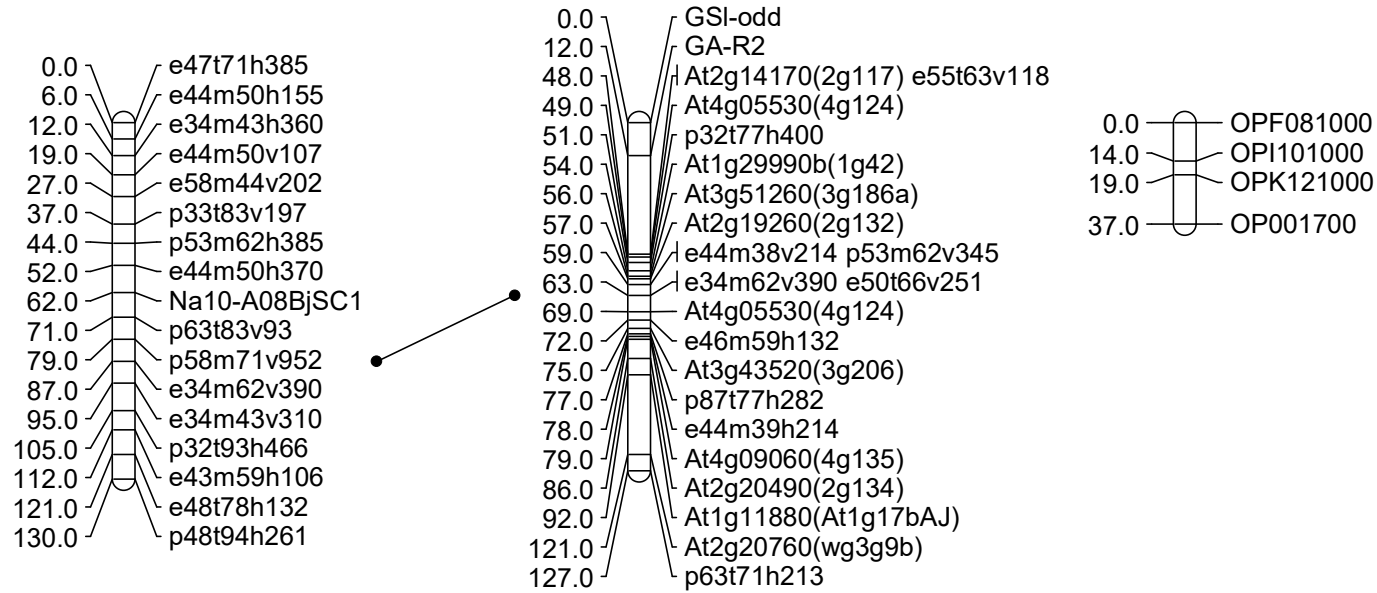

Jagannath\_map\_2010(SE)\_A9

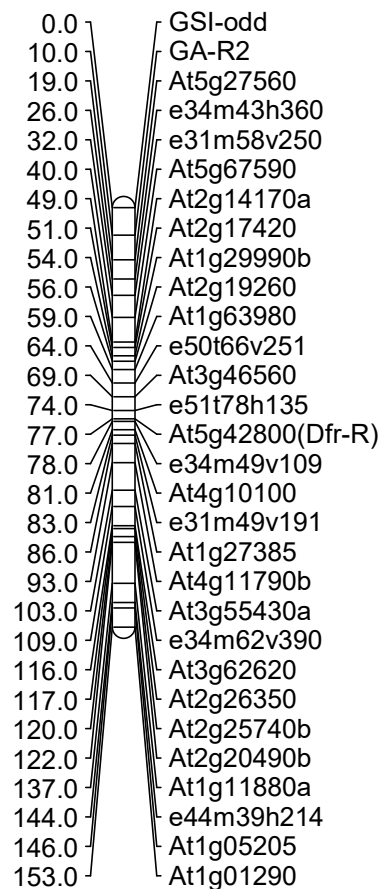

Jagannath\_map\_2010(ZE)\_A9

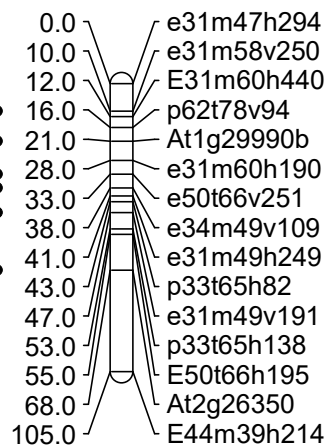

Rout\_map\_2015\_A9

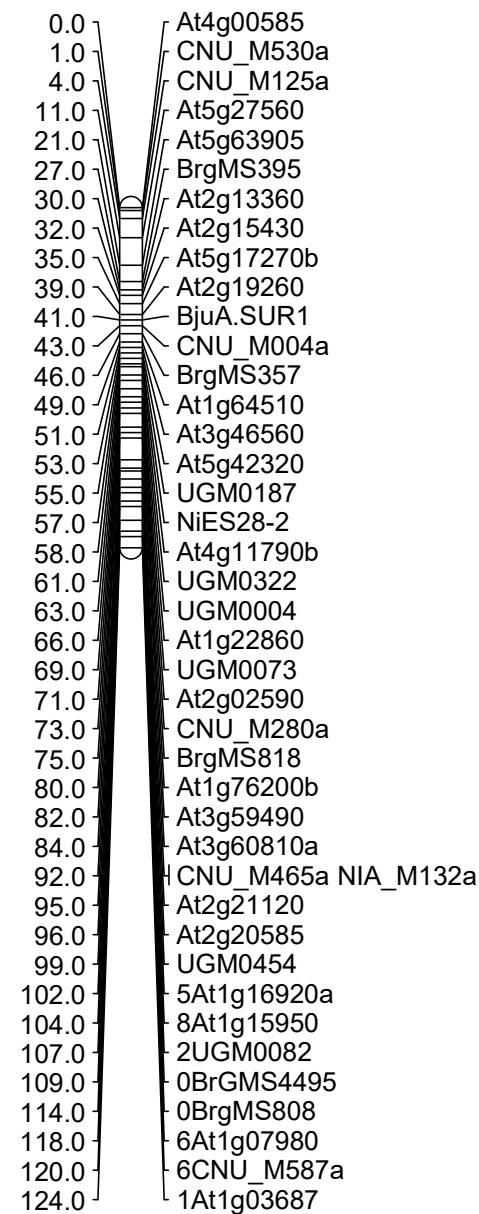

**Rout\_map\_2018\_A9**

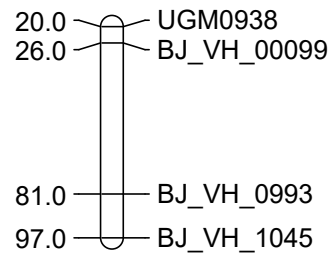

**Sharma\_map\_2002\_A9**

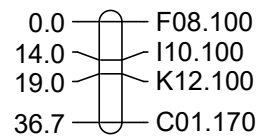

**Aakansha\_map\_2021\_A10**

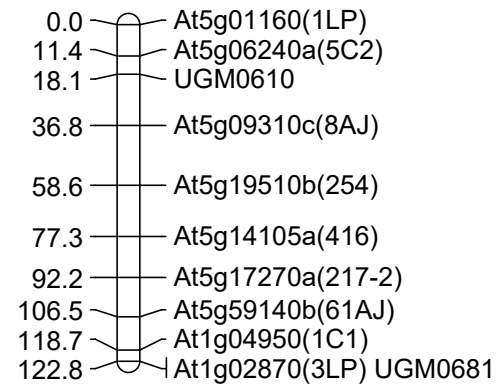

**Dhaka\_map\_2016\_A10**

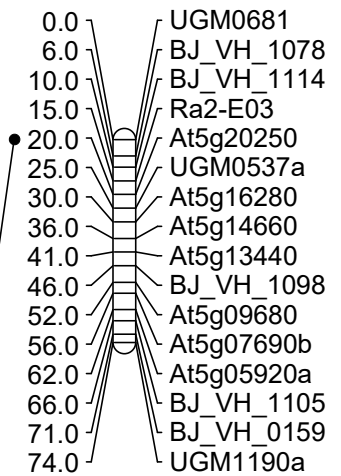

Ramchiary\_map\_2007\_A10

Yadava\_map\_2012\_A10

Jagannath\_map\_2010(ZE)\_A10

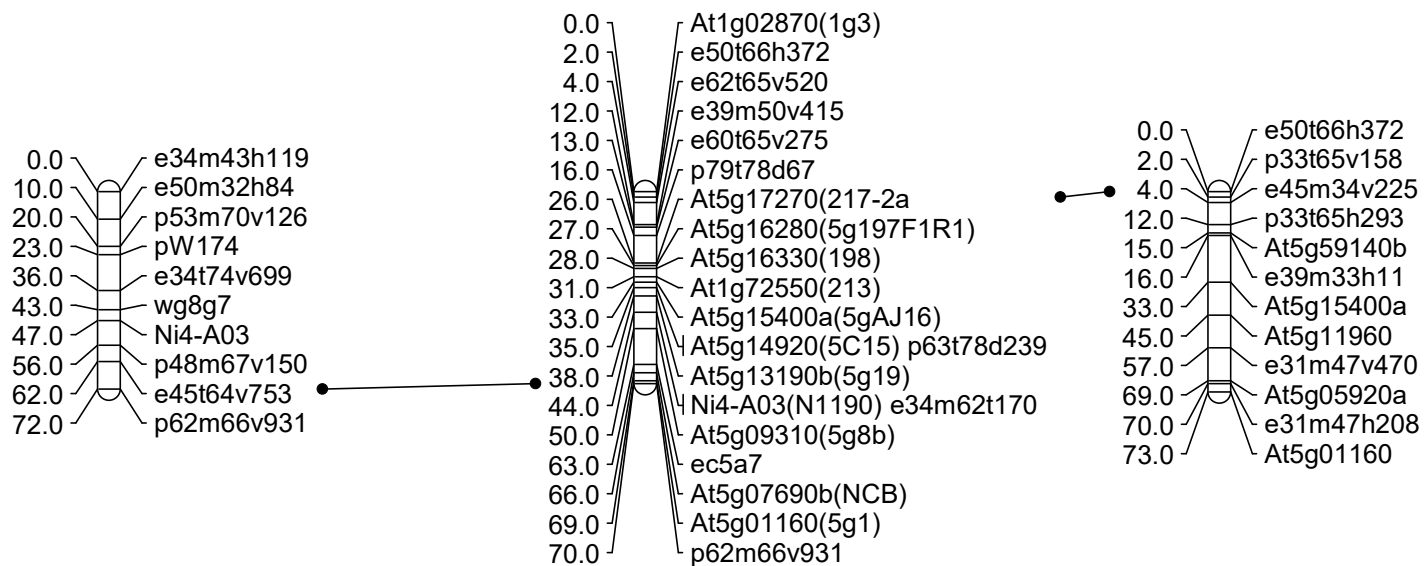



**Rout\_map\_2015\_A10**

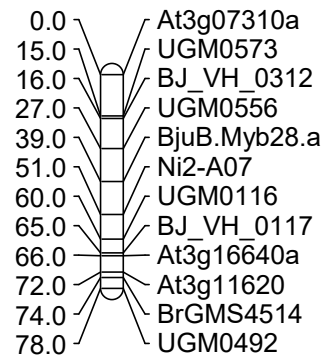

**Rout\_map\_2018\_A10**

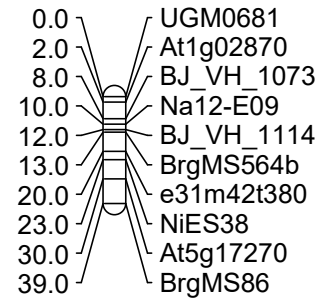

**Aakansha\_map\_2021\_B1**

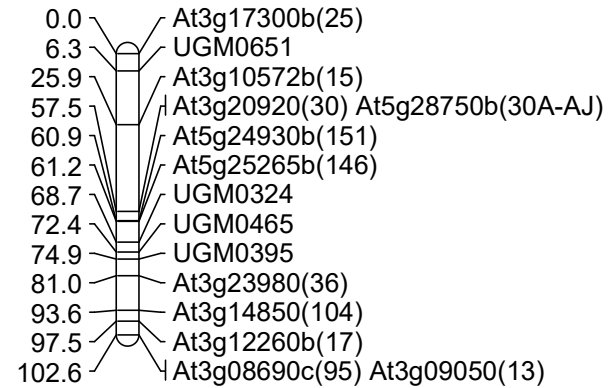

**Ramchiary\_map\_2007\_B1**

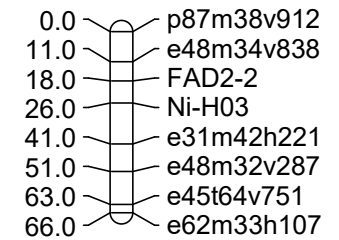

Yadava\_map\_2012\_B1

Jagannath\_map\_2010(SE)\_B1

Lionneton\_map\_2002\_B1

Rout\_map\_2018\_B1

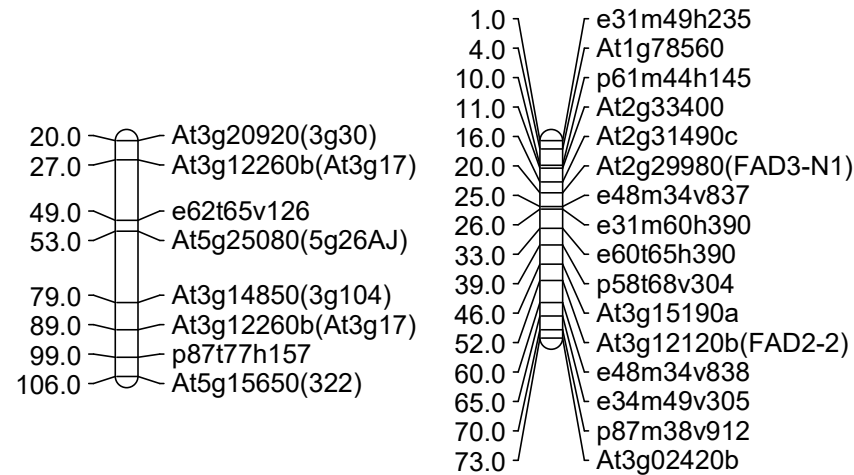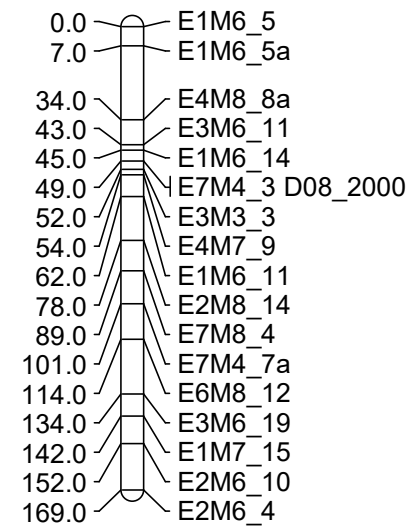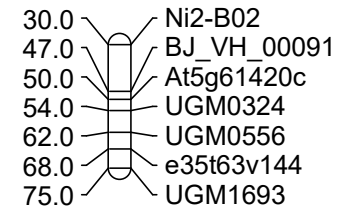

Aakansha\_map\_2021\_B2

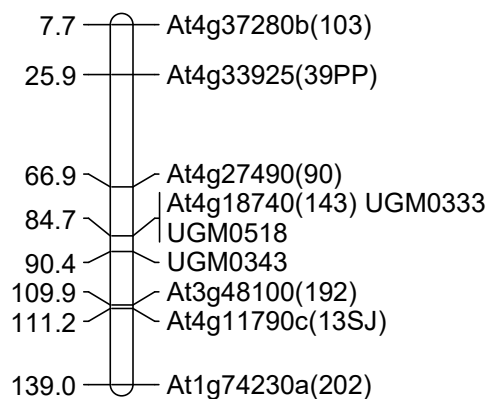

Dhaka\_map\_2016\_B2

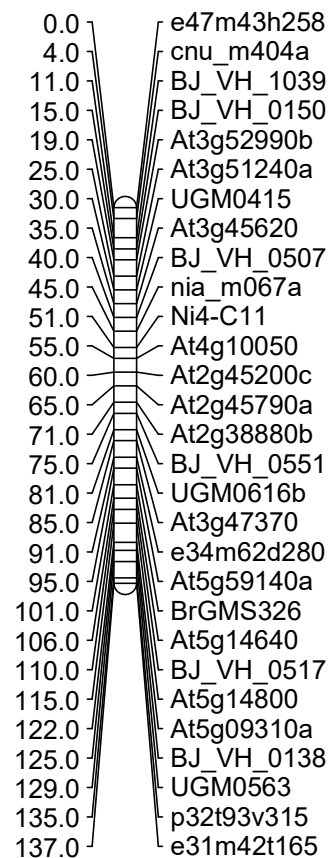

Ramchiary\_map\_2007\_B2

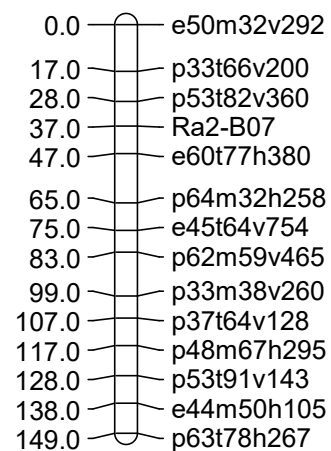

Yadava\_map\_2012\_B2

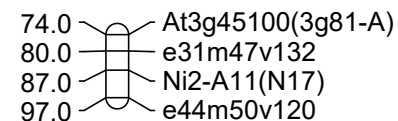

Lionneton\_map\_2004\_B2

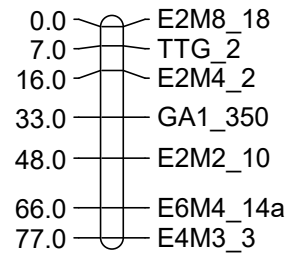

Rout\_map\_2015\_B2

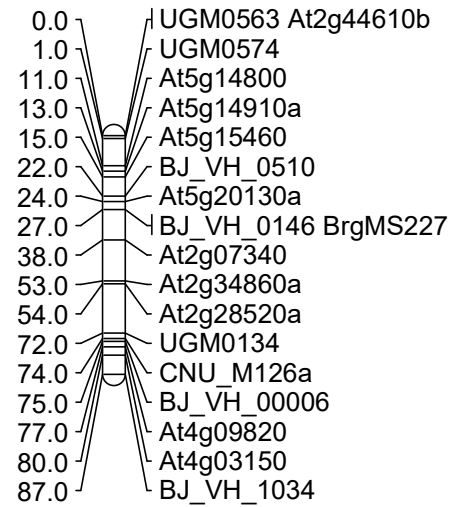

Rout\_map\_2018\_B2

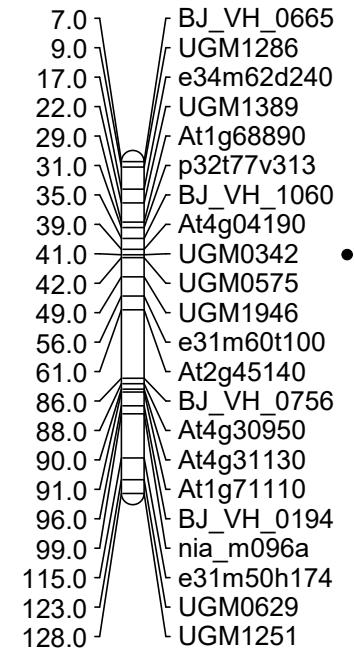

## Aakansha\_map\_2021\_B3

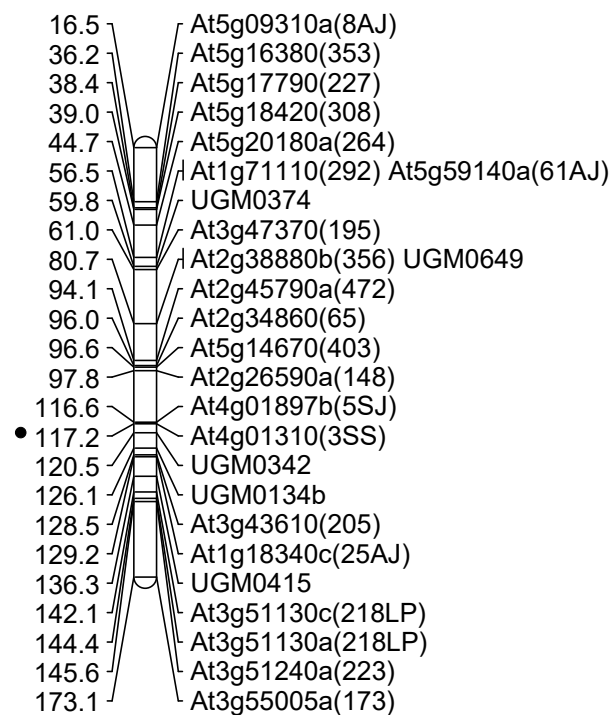

## Ramchiary\_map\_2007\_B3

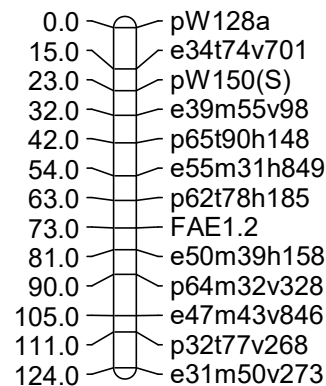

## Yadava\_map\_2012\_B3

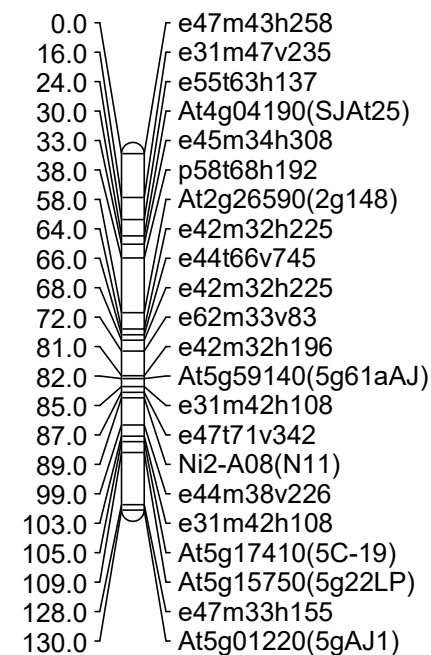

# Aggarwal\_map\_2003\_B3

# Jagannath\_map\_2010(SE)\_B3

# Lionneton\_map\_2004\_B3

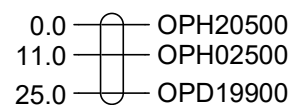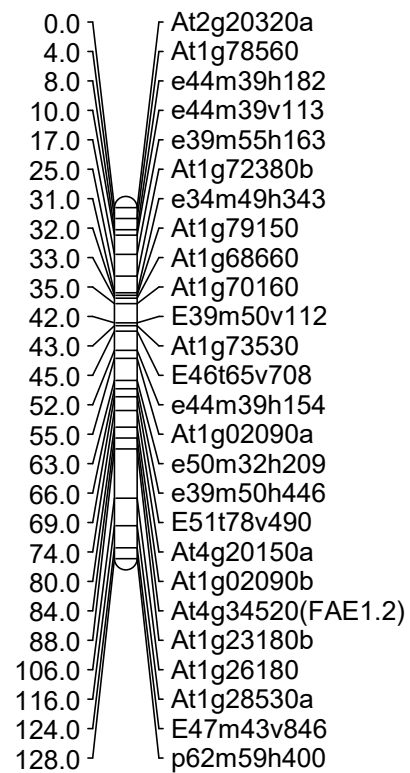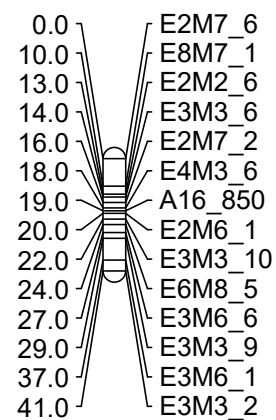

**Rout\_map\_2015\_B3**

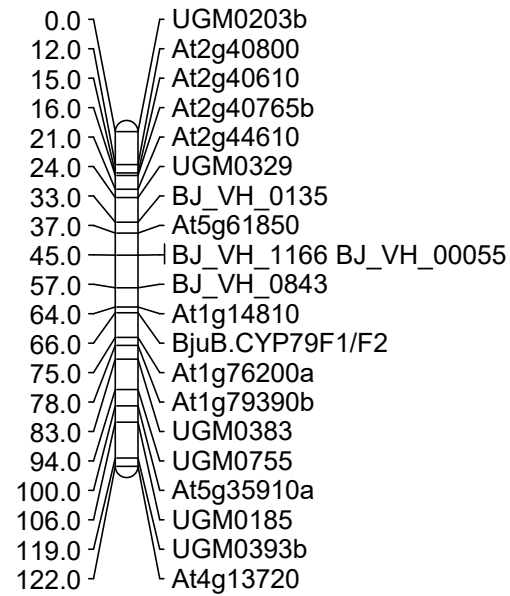

**Rout\_map\_2018\_B3**

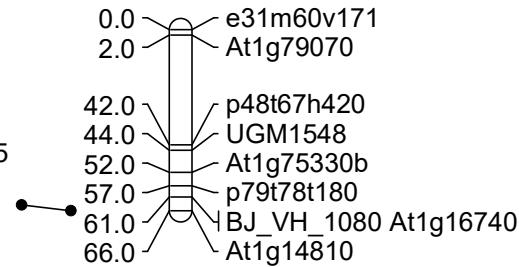

**Aakansha\_map\_2021\_B4**

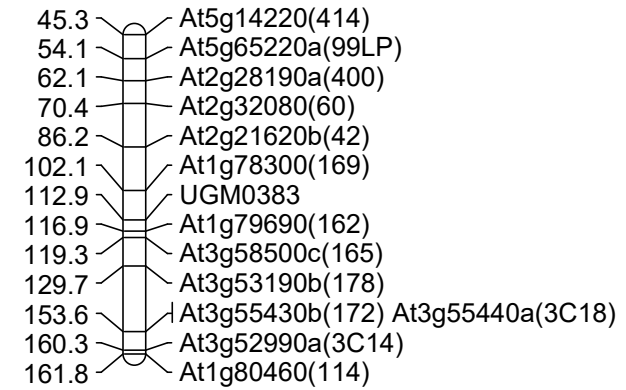

Yadava\_map\_2012\_B4

Lionneton\_map\_2004\_B4

Rout\_map\_2018\_B4

Aakansha\_map\_2021\_B5

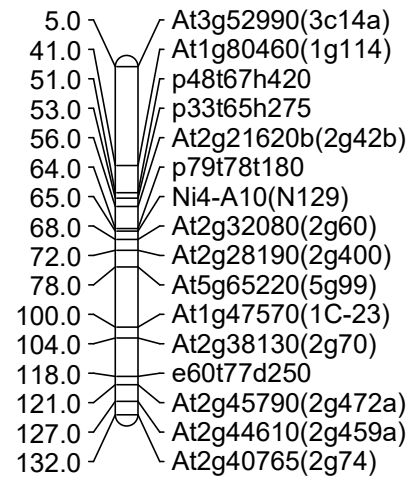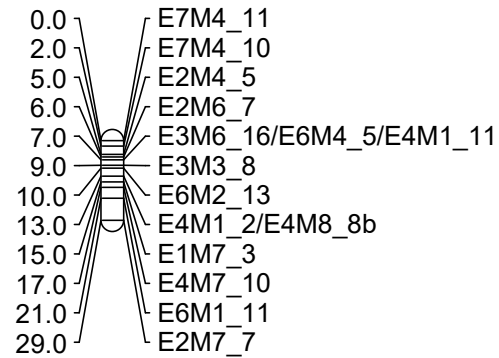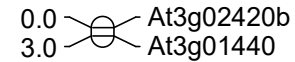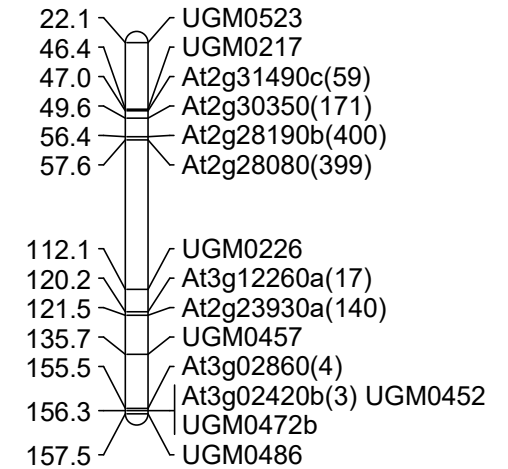



Yadava\_map\_2012\_B5

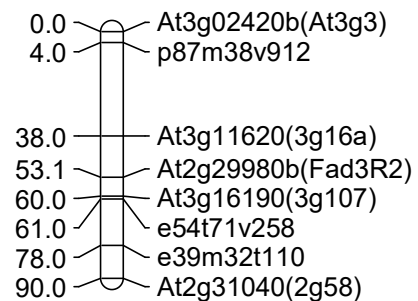

Rout\_map\_2015\_B5

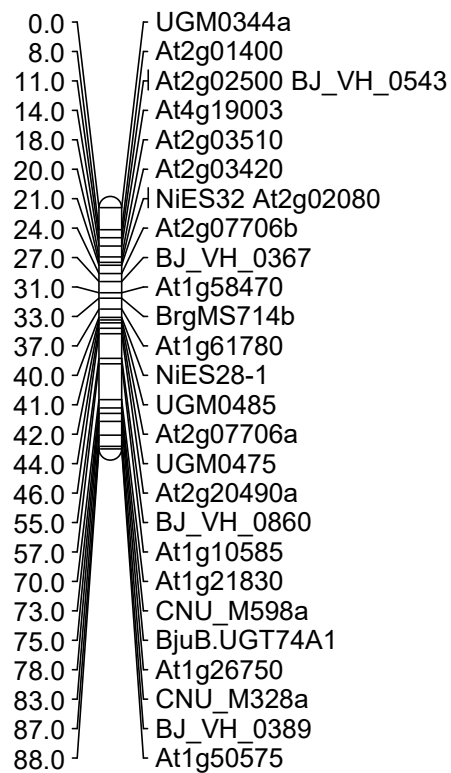

Rout\_map\_2018\_B5

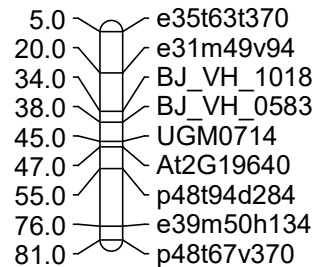

Aakansha\_map\_2021\_B6

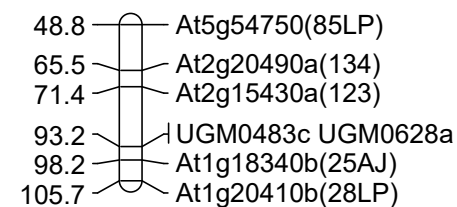

Ramchiary\_map\_2007\_B6    Yadava\_map\_2012\_B6    Jagannath\_map\_2010(SE)\_B6

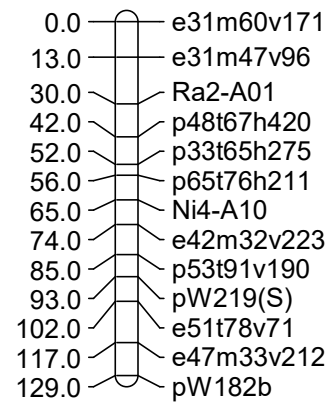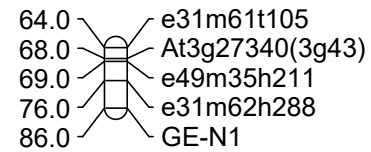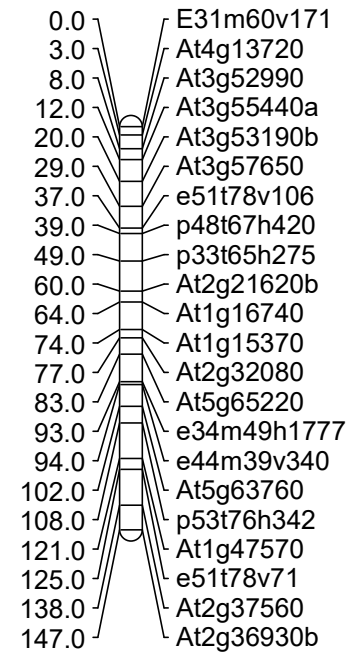

**Lionneton\_map\_2004\_B6**

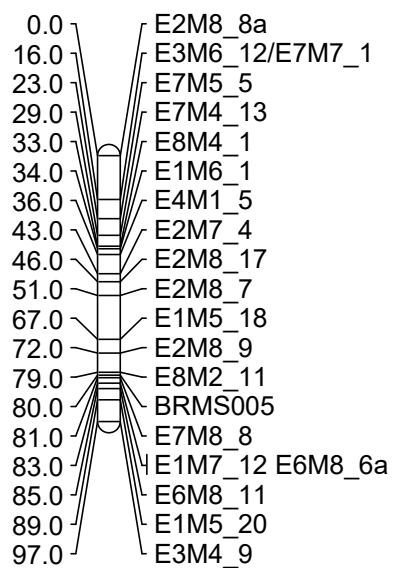

**Rout\_map\_2015\_B6**

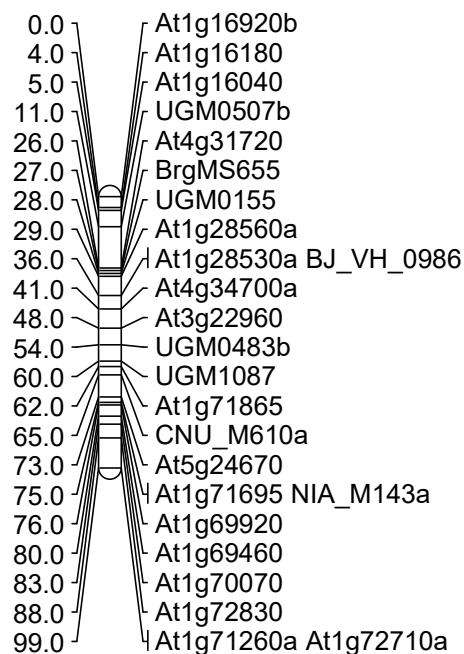

**Rout\_map\_2018\_B6**

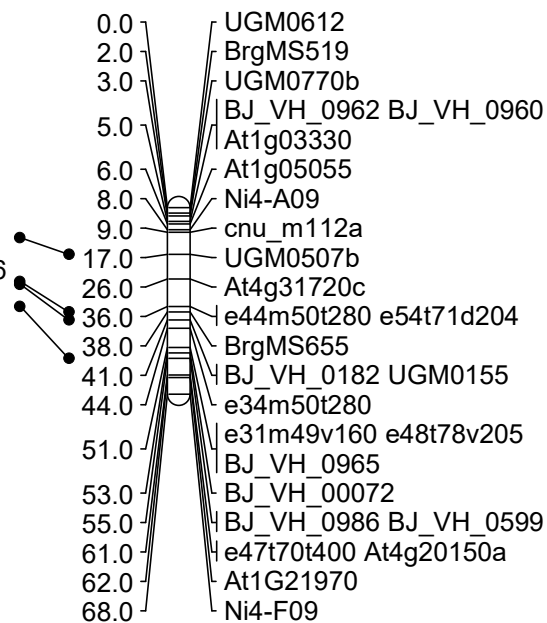

## Aakansha\_map\_2021\_B7

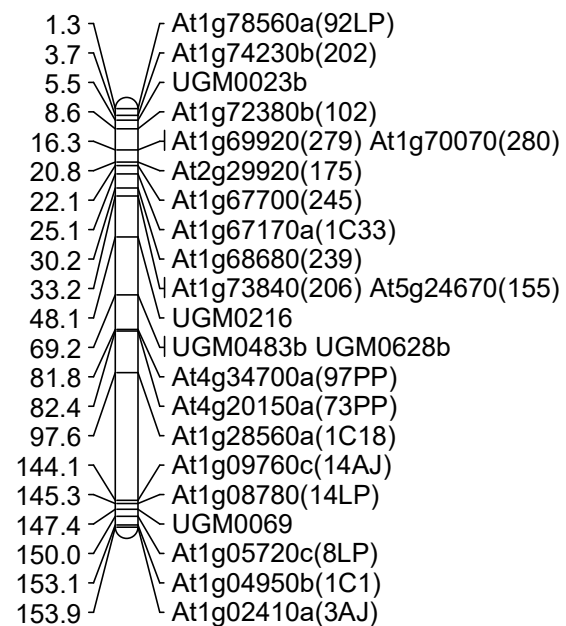

## Ramchiary\_map\_2007\_B7

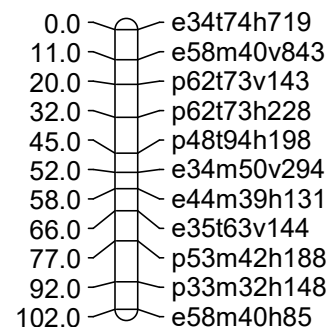

## Yadava\_map\_2012\_B7

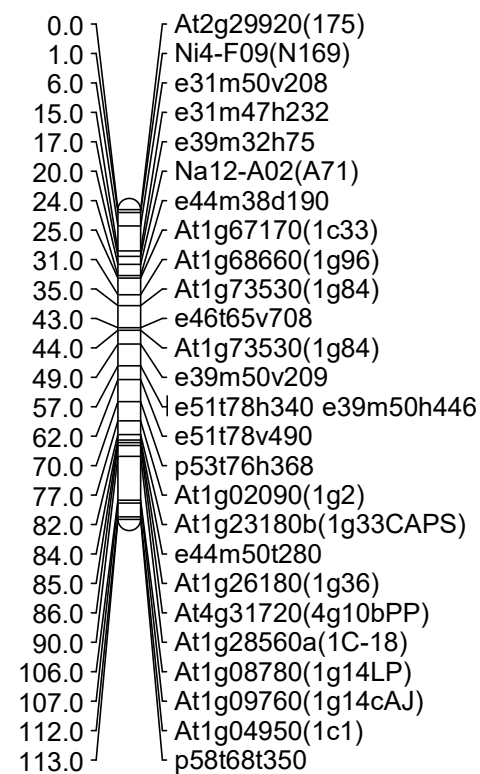

# Aggarwal\_map\_2003\_B7    Gupta\_map\_2004\_B7    Jagannath\_map\_2010(ZE)\_B7

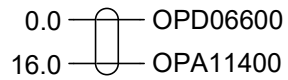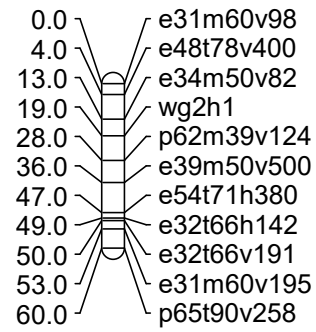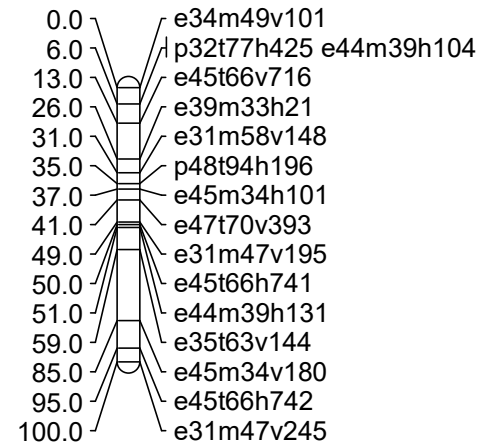

**Rout\_map\_2018\_B7**

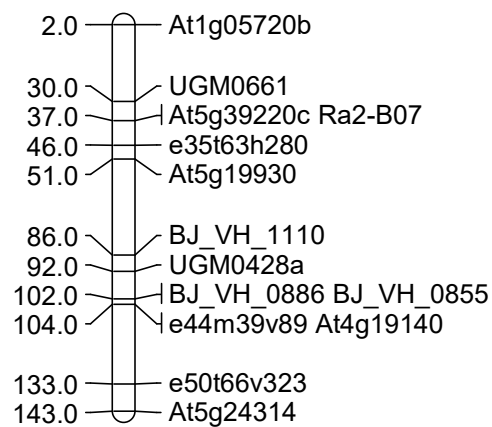

**Aakansha\_map\_2021\_B8**

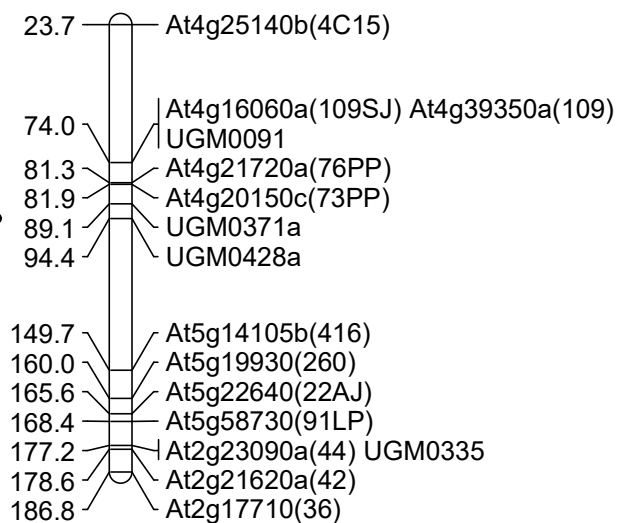

**Ramchiary\_map\_2007\_B8**

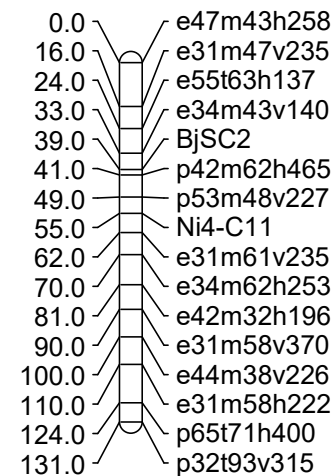

# Yadava\_map\_2012\_B8

# Jagannath\_map\_2010(ZE)\_B8

# Lionneton\_map\_2002\_B8

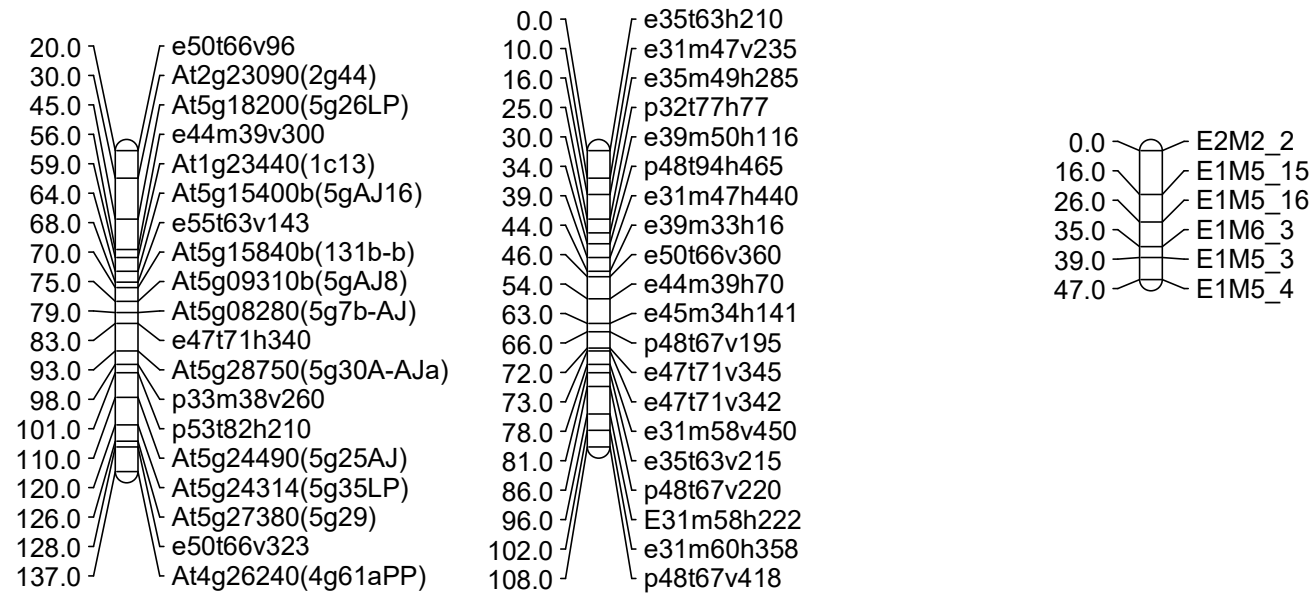

Figure S1. Shared markers among the linkage maps derived from different interval mapping studies.

\*The de novo SNPs used to construct the linkage map (by Aakanksha et al. 2021; <https://doi.org/10.3389/fpls.2021.721631>) are not depicted on the chromosomal maps.
